# Supplementary material
Source: MDPI journal article supplement (https://www.mdpi.com/1424-2818/16/3/162)
Supplement: s1 [file s1]

SIMPER analysis showing the differences between assemblages from different sites. Taxa are shown (60% “cut-off”) and their contribution to dissimilarity. Abbreviations: EA: encrusting algae

|        | Site 3                  |       | Site 1                       |       | Site 2                  |       |
|--------|-------------------------|-------|------------------------------|-------|-------------------------|-------|
| Site 1 | 74,7                    |       |                              |       |                         |       |
|        | Diatom filaments        | 12,20 |                              |       |                         |       |
|        | Pink EA                 | 7,07  |                              |       |                         |       |
|        | <i>H. grandifolius</i>  | 6,94  |                              |       |                         |       |
|        | Substrate               | 6,44  |                              |       |                         |       |
|        | <i>P. decipiens</i>     | 5,67  |                              |       |                         |       |
|        | Indet. red algae 4      | 5,27  |                              |       |                         |       |
|        | White EA                | 4,67  |                              |       |                         |       |
|        | <i>O. validus</i>       | 4,51  |                              |       |                         |       |
|        | <i>Desmarestia</i> sp.  | 3,55  |                              |       |                         |       |
|        | <i>M. acerata</i>       | 3,42  |                              |       |                         |       |
| Site 2 | 71,45                   |       | 68,32                        |       |                         |       |
|        | Diatom filaments        | 12,33 | Diatom filaments             | 7,61  |                         |       |
|        | Pink EA                 | 11,64 | <i>H. grandifolius</i>       | 7,15  |                         |       |
|        | <i>P. decipiens</i>     | 8,80  | Pink EA                      | 6,90  |                         |       |
|        | <i>H. grandifolius</i>  | 8,60  | <i>P. decipiens</i>          | 6,50  |                         |       |
|        | Substrate               | 6,84  | Substrate                    | 5,57  |                         |       |
|        | <i>P. cartilagineum</i> | 5,49  | <i>Desmarestia</i> sp.       | 4,90  |                         |       |
|        | <i>O. validus</i>       | 4,89  | Indet. green algae 1         | 4,58  |                         |       |
|        |                         |       | <i>P. cartilagineum</i>      | 4,21  |                         |       |
|        |                         |       | White EA                     | 4,10  |                         |       |
|        |                         |       | Red EA                       | 3,91  |                         |       |
|        |                         |       | <i>M.(Oxymycale) acerata</i> | 3,40  |                         |       |
|        |                         |       |                              |       |                         |       |
|        |                         |       |                              |       |                         |       |
| Site 4 | 50,42                   |       | 71,33                        |       | 67,22                   |       |
|        | Substrate               | 12,35 | Diatom filaments             | 12,48 | Diatom filaments        | 12,69 |
|        | <i>P. decipiens</i>     | 12,00 | Pink EA                      | 7,37  | Pink EA                 | 10,38 |
|        | Diatom filaments        | 10,26 | <i>H. grandifolius</i>       | 7,34  | <i>H. grandifolius</i>  | 9,46  |
|        | <i>O. validus</i>       | 8,97  | <i>P. decipiens</i>          | 6,32  | <i>P. decipiens</i>     | 9,25  |
|        | <i>H. grandifolius</i>  | 5,89  | Substrate                    | 6,02  | Substrate               | 6,98  |
|        | <i>P. cartilagineum</i> | 5,23  | Indet. green algae 1         | 5,35  | <i>P. cartilagineum</i> | 5,26  |
|        | Pink EA                 | 5,19  | White EA                     | 5,15  | <i>Desmarestia</i> sp.  | 5,23  |
|        |                         |       | <i>Desmarestia</i> sp.       | 4,20  |                         |       |
|        |                         |       | <i>N. concinna</i>           | 3,86  |                         |       |
|        |                         |       |                              |       |                         |       |

SIMPER analysis showing the differences between assemblages from different depths. Taxa are shown (60% “cut-off”) and their contribution to dissimilarity. Abbreviations: EA: encrusting algae; indet: indeterminadas

|      | 5 m                                                                                                                                                                                                                                         | 10 m                                                                                                                                                                                                                                          | 15 m                                                                                                                                                                                                                                                                     |
|------|---------------------------------------------------------------------------------------------------------------------------------------------------------------------------------------------------------------------------------------------|-----------------------------------------------------------------------------------------------------------------------------------------------------------------------------------------------------------------------------------------------|--------------------------------------------------------------------------------------------------------------------------------------------------------------------------------------------------------------------------------------------------------------------------|
| 10 m | 65,4<br>Diatom filaments 14,76<br><i>P. decipiens</i> 11,21<br>Pink EA 10,39<br>Substrate 9,59<br>Desmarestia sp. 7,15<br><i>H. grandifolius</i> 6,28                                                                                       |                                                                                                                                                                                                                                               |                                                                                                                                                                                                                                                                          |
| 15 m | 68,82<br>Diatom filaments 13,00<br><i>P. decipiens</i> 9,26<br>Pink EA 9,21<br><i>H. grandifolius</i> 7,98<br>Substrate 7,64<br>Desmarestia sp. 6,32<br><i>N. concinna</i> 4,61                                                             | 57,55<br><i>H. grandifolius</i> 10,46<br>Diatom filaments 9,80<br>Pink EA 7,88<br><i>P. decipiens</i> 7,37<br>Substrate 7,34<br><i>O. validus</i> 5,40<br>Red EA 4,16<br><i>P. cartilagineum</i> 4,01                                         |                                                                                                                                                                                                                                                                          |
| 20 m | 75,72<br>Diatom filaments 9,95<br><i>P. decipiens</i> 7,59<br>Pink EA 7,37<br>Substrate 6,83<br><i>H. grandifolius</i> 6,13<br><i>P. cartilagineum</i> 5,68<br>Indet. green algae 1 5,12<br>Desmarestia sp. 4,93<br><i>N. concinna</i> 3,74 | 66,42<br>Diatom filaments 9,27<br><i>H. grandifolius</i> 7,65<br>Substrate 6,65<br><i>P. decipiens</i> 6,47<br><i>P. cartilagineum</i> 6,34<br>Pink EA 5,89<br>Indet. green algae 1 5,74<br>Indet. red algae 4 4,41<br><i>O. validus</i> 3,99 | 62,17<br>Diatom filaments 8,41<br><i>H. grandifolius</i> 7,94<br><i>P. cartilagineum</i> 6,45<br><i>P. decipiens</i> 6,21<br>Indet. green algae.1 6,16<br>Substrate 5,75<br>Pink EA 4,45<br>Indet. red algae 4 4,20<br><i>O. validus</i> 4,04<br>Indet. red algae 3 3,94 |
