# Supplementary material
Source: MDPI journal article supplement (https://www.mdpi.com/1424-2818/16/3/162)
Supplement: s1 [file s1]

Full Taxonomic list of taxa present in South Bay, Doumer Island, Antarctica

| Phylum        | Class                      |                                                                                                                                                                                                                                                                                                                                                                                                                                                        |
|---------------|----------------------------|--------------------------------------------------------------------------------------------------------------------------------------------------------------------------------------------------------------------------------------------------------------------------------------------------------------------------------------------------------------------------------------------------------------------------------------------------------|
| Protoctista   |                            | Diatom filaments                                                                                                                                                                                                                                                                                                                                                                                                                                       |
| Porifera      | Demospongiae               | <i>Clathria (Axosuberites) sp.</i><br><i>Demospongiae sp. 1</i><br><i>Demospongiae sp. 2</i><br><i>Dendrilla antarctica</i><br><i>Haliclona (Rhizoniera) sp.</i><br><i>Haliclona (Soestella) sp.</i><br><i>Haliclona sp.</i><br><i>Hymeniacion sp.</i><br><i>Mycale (oxymycale) acerata</i><br><i>Mycale sp.</i><br><i>Sphaerotylus antarcticus</i><br><i>Tedania (Tedaniopsis) sp.</i><br>Indet. Porifera 1<br>Indet. Porifera 2<br>Indet. Porifera 3 |
| Cnidaria      | Anthozoa                   | <i>Clavularia sp.</i><br><i>Urticinopsis antarctica</i><br><i>Hormosoma scotti</i><br>Indet. Anthozoa 1                                                                                                                                                                                                                                                                                                                                                |
| Bryozoa       |                            | Indet. Bryozoa 1                                                                                                                                                                                                                                                                                                                                                                                                                                       |
| Brachypoda    |                            | Indet. Brachypoda 1                                                                                                                                                                                                                                                                                                                                                                                                                                    |
| Nemertea      | <i>Anopla</i>              | <i>Parborlasia corrugatus</i>                                                                                                                                                                                                                                                                                                                                                                                                                          |
| Mollusca      | <i>Gastropoda</i>          | <i>Doris kerguelensis</i><br><i>Margarella antarctica</i><br><i>Nacella concinna</i><br>Indet. Gastropoda 1                                                                                                                                                                                                                                                                                                                                            |
| Echinodermata | Crinoidea<br>Asteroidea    | <i>Promachocrinus kerguelensis</i><br><i>Odontaster validus</i><br><i>Odonaster meridionalis</i><br><i>Granaster nutrix</i><br><i>Labidiaster annulatus</i><br><i>Perknaster sp.</i><br>Indet. Asteroidea 1<br>Indet. Asteroidea 2<br><i>Heterocucumis steineni</i>                                                                                                                                                                                    |
| Chordata      | Holoturoidea<br>Ascidiacea | <i>Cnemidocarpa verrucosa</i><br><i>Corella antarctica</i><br><i>Pyura setosa</i>                                                                                                                                                                                                                                                                                                                                                                      |
| Chlorophyta   | Ulvophyceae                | Indet. Chlorophyta 1<br>Indet. Chlorophyta 2<br>Indet. Chlorophyta 3<br><i>Monostroma harioti</i>                                                                                                                                                                                                                                                                                                                                                      |
| Rhodophyta    | Florideophyceae            | <i>Delesseria sp.</i><br><i>Gigartina skottsbergii</i>                                                                                                                                                                                                                                                                                                                                                                                                 |

Indet. Rhodophyta 4

|            |              |                                    |
|------------|--------------|------------------------------------|
| Ochrophyta | Phaeophyceae | Desmarestia sp.                    |
|            |              | <i>Himantothallus grandifolius</i> |
|            |              | Indet. Phaeophyceae 1              |
